# Supplementary material for: Multiclass classification of breast cancer histopathology images using multilevel features of deep convolutional neural network
Source: PubMed Central journal article supplement (PMC9649689; doi:10.1038/s41598-022-19278-2), 2022-09-16
Supplement: 41598_2022_19278_MOESM1_ESM.pdf [file 41598_2022_19278_MOESM1_ESM.pdf]

# Multiclass classification of breast cancer histopathology images using multilevel features of deep convolutional neural network

Zabith Hameed<sup>1,\*</sup>, Begonya Garcia-Zapirain<sup>1</sup>, José Javier Aguirre<sup>2,3,4</sup>, and Mario Arturo Isaza-Ruget<sup>5</sup>

<sup>1</sup>eVida Research Group, University of Deusto, Bilbao, 48007, Spain

<sup>2</sup>Bioaraba Health Research Institute, Oncology Diagnostics and Therapeutics Area, Department of Pathological Anatomy, University Hospital of Alava. Vitoria, 01009, Spain

<sup>3</sup>NanoBioCel Research Group, School of Pharmacy, University of the Basque Country (UPV/EHU), Vitoria, 01006, Spain

<sup>4</sup>Biokeralty Reseach Institute. Vitoria, 01510, Spain

<sup>5</sup>Fundación Universitaria Sanitas, Bogotá, 110131, Colombia

\*zabithameed@deusto.es

**Table S1.** Evaluation metrics of the default AlexNet model (baseline) as a feature extractor using the original and normalized datasets.

| Dataset  | Confusion Matrices    |      |      |      | Performance Evaluation |       |      |      |      |          |       |
|----------|-----------------------|------|------|------|------------------------|-------|------|------|------|----------|-------|
|          | Predict →<br>Actual ↓ | Ben. | Ins. | Inv. | Nor.                   | Prec. | Rec. | F1   | Test | Accuracy | Kappa |
| Original | Benign                | 35   | 10   | 3    | 2                      | 0.73  | 0.70 | 0.71 | 50   | 82.44%   | 0.720 |
|          | In situ               | 9    | 39   | 2    | 0                      | 0.70  | 0.78 | 0.74 | 50   |          |       |
|          | Invasive              | 0    | 5    | 221  | 4                      | 0.84  | 0.96 | 0.89 | 230  |          |       |
|          | Normal                | 4    | 2    | 38   | 76                     | 0.93  | 0.63 | 0.75 | 120  |          |       |
| Reinhard | Benign                | 33   | 10   | 3    | 4                      | 0.52  | 0.66 | 0.58 | 50   | 76.66%   | 0.633 |
|          | In situ               | 8    | 39   | 2    | 1                      | 0.64  | 0.78 | 0.70 | 50   |          |       |
|          | Invasive              | 4    | 9    | 214  | 3                      | 0.83  | 0.93 | 0.88 | 230  |          |       |
|          | Normal                | 19   | 3    | 39   | 59                     | 0.88  | 0.49 | 0.63 | 120  |          |       |
| Ruifrok  | Benign                | 31   | 13   | 3    | 3                      | 0.72  | 0.62 | 0.67 | 50   | 81.55%   | 0.708 |
|          | In situ               | 9    | 39   | 2    | 0                      | 0.62  | 0.78 | 0.69 | 50   |          |       |
|          | Invasive              | 2    | 7    | 215  | 6                      | 0.85  | 0.93 | 0.89 | 230  |          |       |
|          | Normal                | 1    | 4    | 33   | 82                     | 0.90  | 0.68 | 0.78 | 120  |          |       |
| Macenko  | Benign                | 30   | 13   | 4    | 3                      | 0.75  | 0.60 | 0.67 | 50   | 81.33%   | 0.702 |
|          | In situ               | 7    | 40   | 3    | 0                      | 0.63  | 0.80 | 0.71 | 50   |          |       |
|          | Invasive              | 1    | 6    | 218  | 5                      | 0.84  | 0.95 | 0.89 | 230  |          |       |
|          | Normal                | 2    | 4    | 36   | 78                     | 0.91  | 0.65 | 0.76 | 120  |          |       |
| Vahadane | Benign                | 27   | 18   | 2    | 3                      | 0.77  | 0.54 | 0.64 | 50   | 78.89%   | 0.667 |
|          | In situ               | 6    | 42   | 2    | 0                      | 0.53  | 0.84 | 0.65 | 50   |          |       |
|          | Invasive              | 1    | 8    | 216  | 5                      | 0.84  | 0.94 | 0.89 | 230  |          |       |
|          | Normal                | 1    | 12   | 37   | 70                     | 0.90  | 0.58 | 0.71 | 120  |          |       |

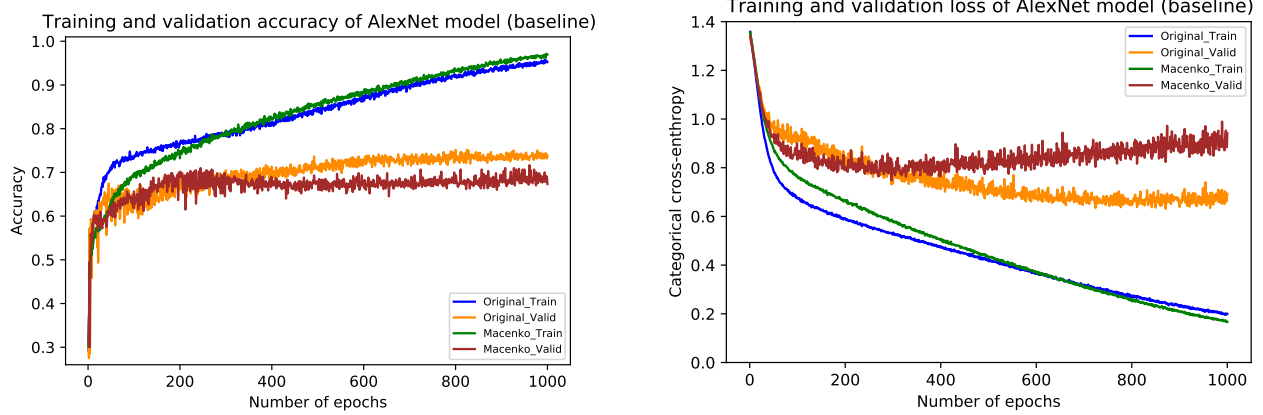

**Figure S1.** The left-hand side shows training and validation accuracy curves of the original dataset and Macenko normalization on the default settings of the AlexNet model (baseline) as a feature extractor. Whereas the right-hand side depicts training and validation loss curves of the original dataset and Macenko normalization.

**Table S2.** Evaluation metrics of the default VGG16 model as a feature extractor using the original and normalized datasets.

| Dataset  | Confusion Matrices    |      |      |      | Performance Evaluation |       |      |      |      |          |       |
|----------|-----------------------|------|------|------|------------------------|-------|------|------|------|----------|-------|
|          | Predict →<br>Actual ↓ | Ben. | Ins. | Inv. | Nor.                   | Prec. | Rec. | F1   | Test | Accuracy | Kappa |
| Original | Benign                | 42   | 5    | 1    | 2                      | 0.79  | 0.84 | 0.82 | 50   | 90.44%   | 0.852 |
|          | In situ               | 7    | 40   | 3    | 0                      | 0.77  | 0.80 | 0.78 | 50   |          |       |
|          | Invasive              | 1    | 4    | 217  | 8                      | 0.96  | 0.94 | 0.95 | 230  |          |       |
|          | Normal                | 3    | 3    | 6    | 108                    | 0.92  | 0.90 | 0.91 | 120  |          |       |
| Reinhard | Benign                | 42   | 5    | 1    | 2                      | 0.67  | 0.84 | 0.74 | 50   | 88.00%   | 0.814 |
|          | In situ               | 11   | 35   | 4    | 0                      | 0.78  | 0.70 | 0.74 | 50   |          |       |
|          | Invasive              | 2    | 3    | 216  | 9                      | 0.95  | 0.94 | 0.94 | 230  |          |       |
|          | Normal                | 8    | 2    | 7    | 103                    | 0.90  | 0.86 | 0.88 | 120  |          |       |
| Ruifrok  | Benign                | 38   | 4    | 3    | 5                      | 0.67  | 0.76 | 0.71 | 50   | 87.11%   | 0.800 |
|          | In situ               | 8    | 39   | 2    | 1                      | 0.81  | 0.78 | 0.80 | 50   |          |       |
|          | Invasive              | 2    | 3    | 215  | 10                     | 0.94  | 0.93 | 0.94 | 230  |          |       |
|          | Normal                | 9    | 2    | 9    | 100                    | 0.86  | 0.83 | 0.85 | 120  |          |       |
| Macenko  | Benign                | 41   | 5    | 1    | 3                      | 0.76  | 0.82 | 0.79 | 50   | 89.55%   | 0.839 |
|          | In situ               | 6    | 41   | 2    | 1                      | 0.82  | 0.82 | 0.82 | 50   |          |       |
|          | Invasive              | 2    | 3    | 213  | 12                     | 0.96  | 0.93 | 0.94 | 230  |          |       |
|          | Normal                | 5    | 1    | 6    | 108                    | 0.87  | 0.90 | 0.89 | 120  |          |       |
| Vahadane | Benign                | 41   | 6    | 1    | 2                      | 0.82  | 0.82 | 0.82 | 50   | 89.55%   | 0.838 |
|          | In situ               | 6    | 41   | 3    | 0                      | 0.77  | 0.82 | 0.80 | 50   |          |       |
|          | Invasive              | 1    | 3    | 215  | 11                     | 0.94  | 0.93 | 0.94 | 230  |          |       |
|          | Normal                | 2    | 3    | 9    | 106                    | 0.89  | 0.88 | 0.89 | 120  |          |       |

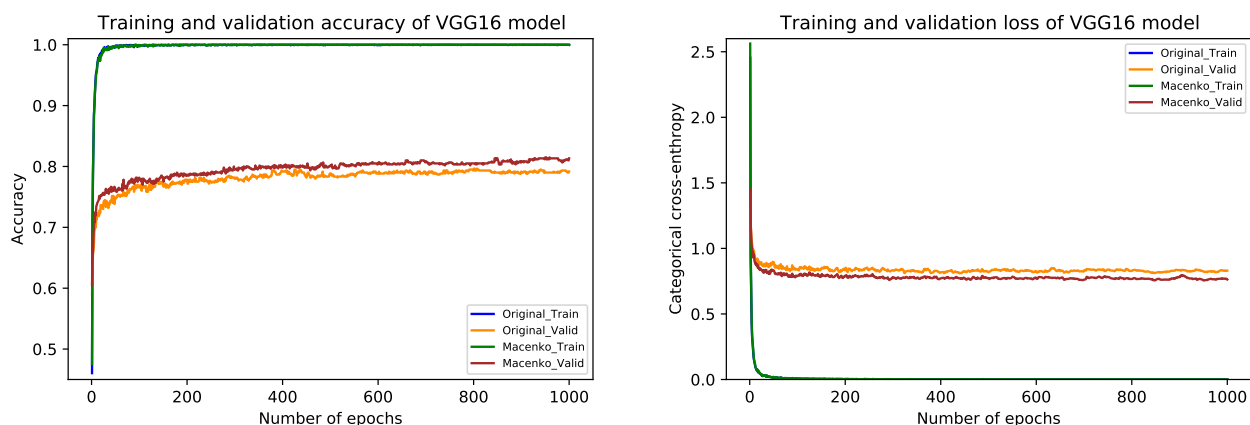

**Figure S2.** The left-hand side shows training and validation accuracy curves of the original dataset and Macenko normalization on the default settings of the VGG16 model as a feature extractor. Whereas the right-hand side depicts training and validation loss curves of the original dataset and Macenko normalization.

**Table S3.** Evaluation metrics of the default VGG19 model as a feature extractor using the original and normalized datasets.

| Dataset  | Predict →<br>Actual ↓ | Confusion Matrices |      |      |      | Performance Evaluation |      |      |      |          |       |
|----------|-----------------------|--------------------|------|------|------|------------------------|------|------|------|----------|-------|
|          |                       | Ben.               | Ins. | Inv. | Nor. | Prec.                  | Rec. | F1   | Test | Accuracy | Kappa |
| Original | Benign                | 45                 | 3    | 0    | 2    | 0.66                   | 0.90 | 0.76 | 50   | 87.33%   | 0.805 |
|          | In situ               | 15                 | 31   | 3    | 1    | 0.82                   | 0.62 | 0.70 | 50   |          |       |
|          | Invasive              | 4                  | 1    | 210  | 15   | 0.96                   | 0.91 | 0.94 | 230  |          |       |
|          | Normal                | 4                  | 3    | 6    | 107  | 0.86                   | 0.89 | 0.87 | 120  |          |       |
| Reinhard | Benign                | 46                 | 3    | 1    | 0    | 0.64                   | 0.92 | 0.75 | 50   | 88.89%   | 0.824 |
|          | In situ               | 16                 | 30   | 2    | 2    | 0.86                   | 0.60 | 0.71 | 50   |          |       |
|          | Invasive              | 2                  | 1    | 218  | 9    | 0.96                   | 0.95 | 0.96 | 230  |          |       |
|          | Normal                | 8                  | 1    | 5    | 106  | 0.91                   | 0.88 | 0.89 | 120  |          |       |
| Ruifrok  | Benign                | 40                 | 7    | 2    | 1    | 0.65                   | 0.80 | 0.71 | 50   | 88.00%   | 0.814 |
|          | In situ               | 13                 | 34   | 2    | 1    | 0.77                   | 0.68 | 0.72 | 50   |          |       |
|          | Invasive              | 4                  | 0    | 217  | 9    | 0.95                   | 0.94 | 0.95 | 230  |          |       |
|          | Normal                | 5                  | 3    | 7    | 105  | 0.91                   | 0.88 | 0.89 | 120  |          |       |
| Macenko  | Benign                | 44                 | 4    | 1    | 1    | 0.70                   | 0.88 | 0.78 | 50   | 89.11%   | 0.832 |
|          | In situ               | 12                 | 34   | 3    | 1    | 0.83                   | 0.68 | 0.75 | 50   |          |       |
|          | Invasive              | 3                  | 1    | 213  | 13   | 0.96                   | 0.93 | 0.94 | 230  |          |       |
|          | Normal                | 4                  | 2    | 4    | 110  | 0.88                   | 0.92 | 0.90 | 120  |          |       |
| Vahadane | Benign                | 43                 | 5    | 1    | 1    | 0.67                   | 0.86 | 0.75 | 50   | 89.11%   | 0.832 |
|          | In situ               | 13                 | 33   | 2    | 2    | 0.82                   | 0.66 | 0.73 | 50   |          |       |
|          | Invasive              | 3                  | 1    | 216  | 10   | 0.96                   | 0.94 | 0.95 | 230  |          |       |
|          | Normal                | 5                  | 1    | 5    | 109  | 0.89                   | 0.91 | 0.89 | 120  |          |       |

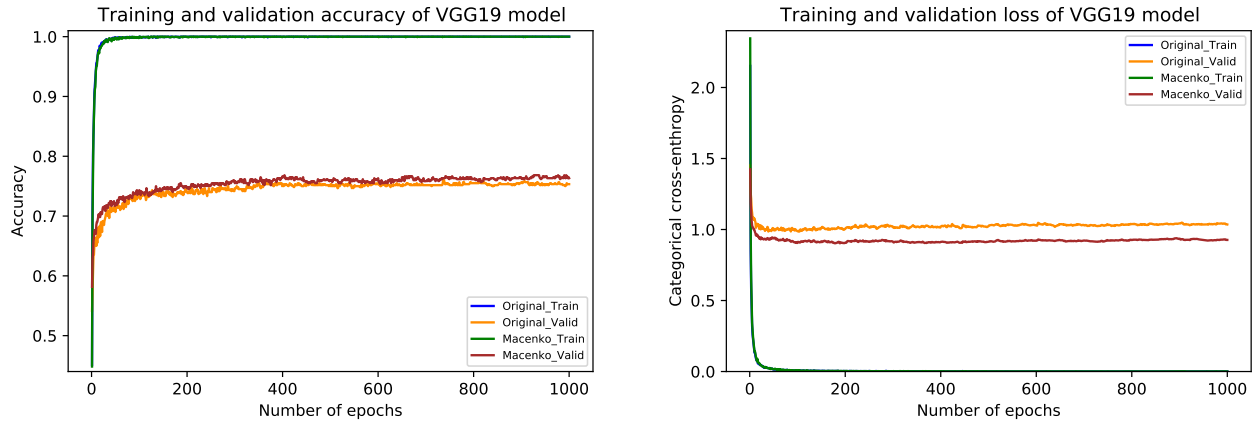

**Figure S3.** The left-hand side shows training and validation accuracy curves of the original dataset and Macenko normalization on the default settings of the VGG19 model as a feature extractor. Whereas the right-hand side depicts training and validation loss curves of the original dataset and Macenko normalization.

**Table S4.** Evaluation metrics of the default Inception-v3 model as a feature extractor using the original and normalized datasets.

| Dataset  | Confusion Matrices    |      |      |      | Performance Evaluation |       |      |      |      |          |       |
|----------|-----------------------|------|------|------|------------------------|-------|------|------|------|----------|-------|
|          | Predict →<br>Actual ↓ | Ben. | Ins. | Inv. | Nor.                   | Prec. | Rec. | F1   | Test | Accuracy | Kappa |
| Original | Benign                | 45   | 2    | 0    | 3                      | 0.82  | 0.90 | 0.86 | 50   | 94.66%   | 0.917 |
|          | In situ               | 7    | 41   | 2    | 0                      | 0.91  | 0.82 | 0.86 | 50   |          |       |
|          | Invasive              | 1    | 1    | 225  | 3                      | 0.98  | 0.98 | 0.98 | 230  |          |       |
|          | Normal                | 2    | 1    | 2    | 115                    | 0.95  | 0.96 | 0.95 | 120  |          |       |
| Reinhard | Benign                | 44   | 3    | 0    | 3                      | 0.83  | 0.88 | 0.85 | 50   | 94.44%   | 0.914 |
|          | In situ               | 5    | 43   | 0    | 2                      | 0.90  | 0.86 | 0.88 | 50   |          |       |
|          | Invasive              | 2    | 1    | 223  | 4                      | 0.99  | 0.97 | 0.98 | 230  |          |       |
|          | Normal                | 2    | 1    | 2    | 115                    | 0.93  | 0.96 | 0.94 | 120  |          |       |
| Ruifrok  | Benign                | 44   | 3    | 0    | 3                      | 0.83  | 0.88 | 0.85 | 50   | 94.44%   | 0.914 |
|          | In situ               | 5    | 44   | 1    | 0                      | 0.88  | 0.88 | 0.88 | 50   |          |       |
|          | Invasive              | 4    | 2    | 218  | 6                      | 1.00  | 0.95 | 0.97 | 230  |          |       |
|          | Normal                | 0    | 1    | 0    | 119                    | 0.93  | 0.99 | 0.96 | 120  |          |       |
| Macenko  | Benign                | 42   | 4    | 0    | 4                      | 0.84  | 0.84 | 0.84 | 50   | 93.55%   | 0.900 |
|          | In situ               | 5    | 43   | 1    | 1                      | 0.88  | 0.86 | 0.87 | 50   |          |       |
|          | Invasive              | 1    | 1    | 221  | 7                      | 0.99  | 0.96 | 0.97 | 230  |          |       |
|          | Normal                | 2    | 1    | 2    | 115                    | 0.91  | 0.96 | 0.93 | 120  |          |       |
| Vahadane | Benign                | 41   | 5    | 1    | 3                      | 0.82  | 0.82 | 0.82 | 50   | 93.77%   | 0.904 |
|          | In situ               | 6    | 43   | 0    | 1                      | 0.83  | 0.86 | 0.84 | 50   |          |       |
|          | Invasive              | 2    | 3    | 221  | 4                      | 0.99  | 0.96 | 0.98 | 230  |          |       |
|          | Normal                | 1    | 1    | 1    | 117                    | 0.94  | 0.97 | 0.96 | 120  |          |       |

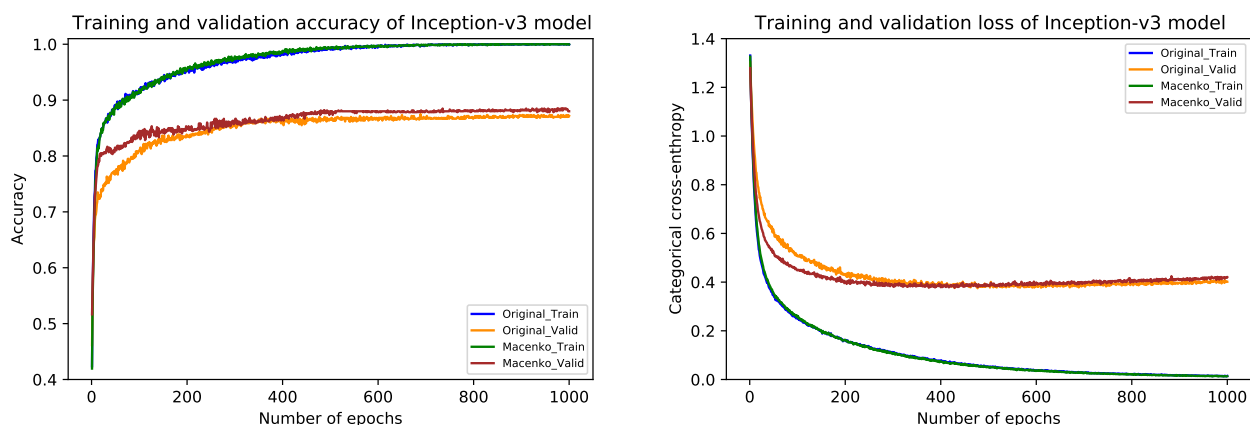

**Figure S4.** The left side shows training and validation accuracy curves of the original dataset and Macenko normalization on the default settings of the Inception-v3 model as a feature extractor. Whereas the right side depicts training and validation loss curves of the original dataset and Macenko normalization.

**Table S5.** Evaluation metrics of the default Xception model as a feature extractor using the original and normalized datasets.

| Dataset  | Confusion Matrices    |      |      |      | Performance Evaluation |       |      |      |      |          |       |
|----------|-----------------------|------|------|------|------------------------|-------|------|------|------|----------|-------|
|          | Predict →<br>Actual ↓ | Ben. | Ins. | Inv. | Nor.                   | Prec. | Rec. | F1   | Test | Accuracy | Kappa |
| Original | Benign                | 47   | 0    | 0    | 3                      | 0.92  | 0.94 | 0.93 | 50   | 96.44%   | 0.945 |
|          | In situ               | 3    | 45   | 1    | 1                      | 0.98  | 0.90 | 0.94 | 50   |          |       |
|          | Invasive              | 0    | 0    | 225  | 5                      | 0.99  | 0.98 | 0.98 | 230  |          |       |
|          | Normal                | 1    | 1    | 1    | 117                    | 0.93  | 0.97 | 0.95 | 120  |          |       |
| Reinhard | Benign                | 47   | 1    | 1    | 1                      | 0.89  | 0.94 | 0.91 | 50   | 96.66%   | 0.948 |
|          | In situ               | 5    | 44   | 1    | 0                      | 0.96  | 0.88 | 0.92 | 50   |          |       |
|          | Invasive              | 0    | 0    | 227  | 3                      | 0.99  | 0.99 | 0.99 | 230  |          |       |
|          | Normal                | 1    | 1    | 1    | 117                    | 0.97  | 0.97 | 0.97 | 120  |          |       |
| Ruifrok  | Benign                | 46   | 2    | 0    | 2                      | 0.90  | 0.92 | 0.91 | 50   | 96.66%   | 0.948 |
|          | In situ               | 3    | 47   | 0    | 0                      | 0.92  | 0.94 | 0.93 | 50   |          |       |
|          | Invasive              | 0    | 1    | 226  | 3                      | 1.00  | 0.98 | 0.99 | 230  |          |       |
|          | Normal                | 2    | 1    | 1    | 116                    | 0.96  | 0.97 | 0.96 | 120  |          |       |
| Macenko  | Benign                | 47   | 0    | 2    | 1                      | 0.87  | 0.94 | 0.90 | 50   | 96.00%   | 0.938 |
|          | In situ               | 4    | 44   | 2    | 0                      | 0.98  | 0.88 | 0.93 | 50   |          |       |
|          | Invasive              | 1    | 0    | 225  | 4                      | 0.98  | 0.98 | 0.98 | 230  |          |       |
|          | Normal                | 2    | 1    | 1    | 116                    | 0.96  | 0.97 | 0.96 | 120  |          |       |
| Vahadane | Benign                | 46   | 1    | 0    | 3                      | 0.88  | 0.92 | 0.90 | 50   | 95.56%   | 0.931 |
|          | In situ               | 4    | 44   | 1    | 1                      | 0.96  | 0.88 | 0.92 | 50   |          |       |
|          | Invasive              | 1    | 0    | 225  | 4                      | 0.98  | 0.98 | 0.98 | 230  |          |       |
|          | Normal                | 1    | 1    | 3    | 115                    | 0.93  | 0.96 | 0.95 | 120  |          |       |

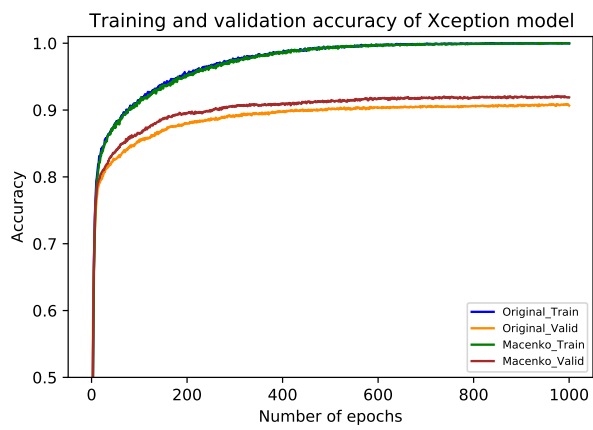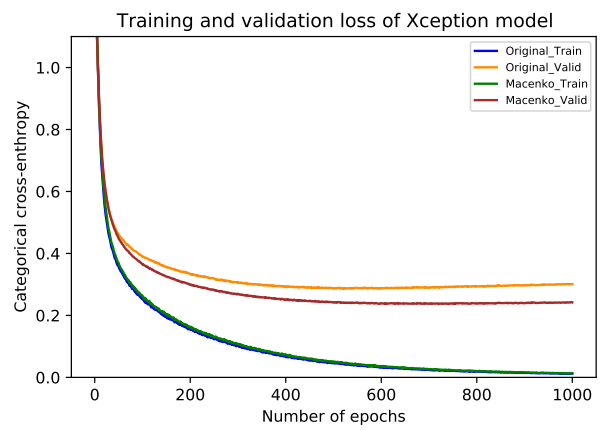

**Figure S5.** The left side demonstrates training and validation accuracy curves of the original dataset and Macenko normalization on the default settings of the Xception model as a feature extractor. Whereas the right side presents training and validation loss curves of the original dataset and Macenko normalization.
